# Supplementary material for: National Trends and Outcomes Associated With Presence and Type of Usual Clinician Among Older Adults With Multimorbidity
Source: PubMed Central journal article supplement (PMC8634053; doi:10.1001/jamanetworkopen.2021.34798), 2021-11-30
Supplement: jamanetwopen-e2134798-s001.pdf [file jamanetwopen-e2134798-s001.pdf]

## Supplemental Online Content

Ganguli I, McGlave C, Rosenthal MB. National trends and outcomes associated with presence and type of usual clinician among older adults with multimorbidity. *JAMA Netw Open*. 2021;4(11):e2134798. doi:10.1001/jamanetworkopen.2021.34798

**eFigure 1.** Data Structure

**eAppendix 1.** Survey Questions Used for Usual Clinician Definitions

**eTable 1.** Definitions of Primary Care and Specialty Clinicians

**eTable 2.** Chronic Conditions and Relevant Specialty Types

**eAppendix 2.** Missingness

**eTable 3.** Trends and Patient and Area-Level Characteristics Associated With Reporting a Usual Clinician of Care, Additional Details

**eTable 4.** Trends and Patient and Area-Level Characteristics Associated With Reporting a Specialist as the Usual Clinician of Care, Additional Details

**eFigure 2.** Specialties of Usual Clinicians Among Respondents Reporting a Specialist in This Role, 2010-2016

This supplemental material has been provided by the authors to give readers additional information about their work.

**eFigure 1. Data Structure**

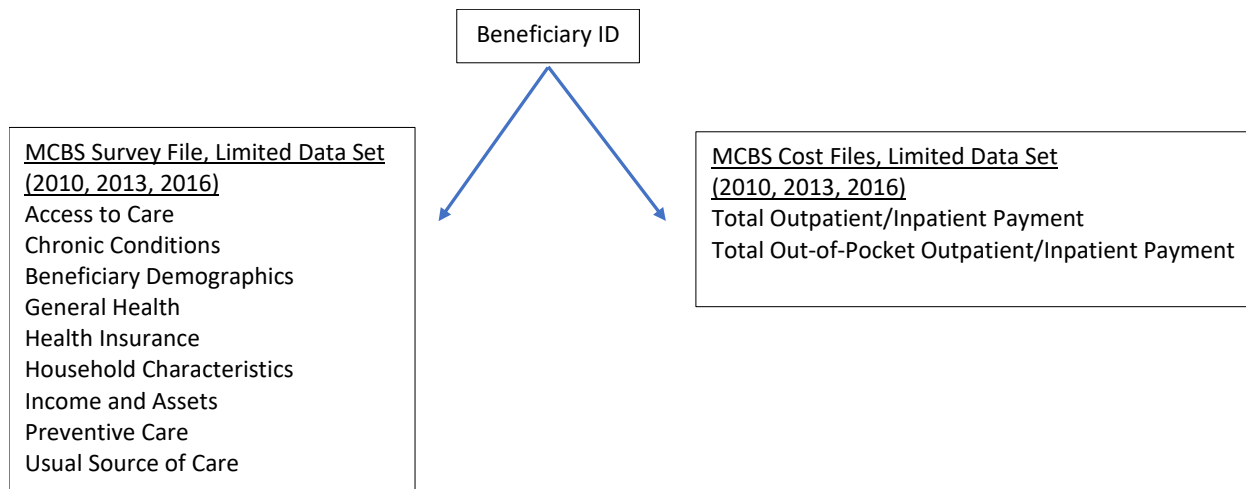

**eAppendix 1. Survey Questions Used for Usual Clinician Definitions**  
**2010 + 2013 – Selected Survey Questions from Community-Based Survey**

1. Is there a particular medical person or a clinic you usually go to when you are sick or for advice about your health?
2. What kind of place do you usually go to when you are sick or for advice about your health -- is that a managed care plan or HMO center, a clinic, a doctor's office, a hospital, or some other place?
3. Is there a particular doctor you usually see at this [place/managed care plan/HMO center]?
4. What is [Provider Name's] specialty?

**2016 – Selected Survey Questions from Community-Based Survey**

1. Is there a particular doctor or other health professional, or a clinic you usually go to when you are sick or for advice about your health?
2. What kind of place do you usually go to when you are sick or for advice about your health -- is that a managed care plan or HMO center, a clinic, a doctor's office, a hospital, or some other place?
3. Is there a particular doctor or other health professional you usually see at this [place/managed care plan/HMO center]?
4. What is [Provider Name's] specialty?

**eTable 1.** Definitions of Primary Care and Specialty Clinicians

| Role         | Specialties                                                                                                                                                                                                                                                                                                                                                                                                 |
|--------------|-------------------------------------------------------------------------------------------------------------------------------------------------------------------------------------------------------------------------------------------------------------------------------------------------------------------------------------------------------------------------------------------------------------|
| Primary care | Family Practice<br>General Practice<br>Geriatrics<br>Hospital Residence<br>Internal Medicine<br>Osteopathy                                                                                                                                                                                                                                                                                                  |
| Specialty    | Allergy/Immunology<br>Anesthesiology<br>Cardiology<br>Dermatology<br>Endocrinology<br>Gastroenterology<br>General Surgery<br>Ob/Gyn<br>Hematology<br>Nephrology<br>Neurology<br>Oncology<br>Ophthalmology<br>Orthopedic Surgery<br>Otorhinolaryngology<br>Physical Medicine and Rehabilitation<br>Plastic Surgery<br>Proctology<br>Psychiatry<br>Pulmonology<br>Rheumatology<br>Thoracic Surgery<br>Urology |

**eTable 2.** Chronic Conditions and Relevant Specialty Types

| <b>Chronic Condition</b>                                                                                     | <b>Relevant Specialty</b>   |
|--------------------------------------------------------------------------------------------------------------|-----------------------------|
| Hypertension                                                                                                 | Cardiology                  |
| Cardiovascular disease including hardening of arteries, angina/coronary heart disease, myocardial infarction | Cardiology                  |
| Congestive heart failure                                                                                     | Cardiology                  |
| Other heart condition                                                                                        | Cardiology                  |
| Pulmonary disease                                                                                            | Pulmonology                 |
| Rheumatoid Arthritis                                                                                         | Rheumatology                |
| Osteoarthritis / Arthritis (other)                                                                           | Orthopedics or Rheumatology |
| Osteoporosis                                                                                                 | Endocrinology               |
| Diabetes                                                                                                     | Endocrinology               |
| Stroke                                                                                                       | Neurology                   |
| Alzheimer's Disease or Alzheimer's Disease-related dementias                                                 | Neurology                   |
| Parkinson's disease                                                                                          | Neurology                   |
| Depression                                                                                                   | Psychiatry                  |
| Mental or psychiatric disorder                                                                               | Psychiatry                  |

## **eAppendix 2. Missingness**

Across 25,490 respondent-years, race was missing for 63 respondent-years (0.25%), Census area was missing for 21 respondent-years (0.08%), and self-reported health was missing for 80 respondent-years (0.31%). Total and out-of-pocket spending were missing for 2,375 respondent-years (9.3%).

**eTable 3.** Trends and Patient and Area-Level Characteristics Associated With Reporting a Usual Clinician of Care, Additional Details

|                |                       | 2010                    | 2013                    | 2016                    | Difference<br>2010 – 2016 | P value<br>for trend<br>test | P value for chi<br>square,<br>2010 vs 2016 | Adjusted marginal<br>percentage point<br>difference between<br>subgroups |
|----------------|-----------------------|-------------------------|-------------------------|-------------------------|---------------------------|------------------------------|--------------------------------------------|--------------------------------------------------------------------------|
|                |                       | No. (%)<br>N = 8,677    | No. (%)<br>N = 8,796    | No. (%)<br>N = 8,017    | % point                   |                              |                                            | % point (95% CI)<br>N = 25,397                                           |
| <b>Overall</b> |                       | <b>8,178<br/>(94.2)</b> | <b>8,115<br/>(91.6)</b> | <b>7,332<br/>(91.0)</b> | -3.2                      | <b>&lt;.001</b>              | <b>&lt;.001</b>                            | --                                                                       |
| Sex            | Male                  | 3,304.<br>(93.6)        | 3,397<br>(90.4)         | 3,061<br>(90.3)         | -3.3                      | 0.72                         | 0.77                                       | Ref                                                                      |
|                | Female                | 4,874<br>(94.6)         | 4,718<br>(92.4)         | 4,271<br>(91.5)         | -3.1                      |                              |                                            | 2.5 (1.5, 3.5)                                                           |
| Age            | 65-74                 | 3,178<br>(94.0)         | 3,248<br>(90.8)         | 2,625<br>(90.6)         | -3.4                      | 0.90                         | 0.95                                       | Ref                                                                      |
|                | 75-84                 | 3,468<br>(94.9)         | 3,403<br>(92.7)         | 3,071<br>(92.1)         | -2.8                      |                              |                                            | 1.6 (0.7, 2.5)                                                           |
|                | 85+                   | 1,532<br>(93.4)         | 1,464<br>(92.6)         | 1,636<br>(90.2)         | -3.2                      |                              |                                            | 1.2 (0.1 2.3)                                                            |
| Income         | <\$15,000             | 1,809<br>(91.0)         | 1,510<br>(87.0)         | 1,386<br>(86.1)         | -4.9                      | 0.67                         | 0.70                                       | Ref                                                                      |
|                | \$15,000-<br>\$29,999 | 2,087<br>(93.9)         | 2,211<br>(91.2)         | 1,991<br>(90.0)         | -3.9                      |                              |                                            | 0.7 (-0.5, 1.9)                                                          |
|                | \$30,000-<br>\$49,999 | 1,766<br>(95.5)         | 1,784<br>(93.0)         | 1,500<br>(92.5)         | -3.0                      |                              |                                            | 1.6 (0.2, 3.0)                                                           |
|                | \$50,000+             | 1,417<br>(96.9)         | 1,903<br>(94.4)         | 2,455<br>(93.2)         | -3.7                      |                              |                                            | 2.2 (1.1, 3.4)                                                           |

|                   |                              |                 |                 |                 |      |       |       |                   |
|-------------------|------------------------------|-----------------|-----------------|-----------------|------|-------|-------|-------------------|
| Race              | White                        | 6,577<br>(95.2) | 6,435<br>(92.5) | 5,889<br>(91.5) | -3.7 | 0.010 | 0.012 | Ref               |
|                   | Black                        | 698 (91.1)      | 717 (87.4)      | 628 (86.3)      | -4.8 |       |       | -2.8 (-4.3, -1.3) |
|                   | Asian/Native/Unknown/Other   | 367 (90.7)      | 385 (91.8)      | 253 (91.3)      | 0.6  |       |       | 0.3 (-1.2, 1.9)   |
|                   | Non-White Hispanic           | 513 (89.5)      | 542 (85.9)      | 562 (91.7)      | 2.2  |       |       | -0.7 (-2.3, 1.0)  |
| Education         | Did not complete high school | 2,048<br>(91.7) | 1,738<br>(87.5) | 1,428<br>(87.2) | -4.6 | 0.99  | 0.99  | Ref               |
|                   | High school or above         | 6,130<br>(95.0) | 6,377<br>(92.5) | 5,904<br>(91.8) | -3.2 |       |       | 1.8 (0.7, 2.9)    |
| Marital status    | Not married                  | 3,978<br>(92.9) | 3,774<br>(88.7) | 3,560<br>(88.5) | -4.3 | 0.81  | 0.79  | Ref               |
|                   | Married                      | 4,200<br>(95.4) | 4,341<br>(93.9) | 3,772<br>(93.0) | -2.4 |       |       | 3.0 (1.8, 4.1)    |
| Living Situation  | Lives alone                  | 2,675<br>(93.4) | 2,539<br>(88.7) | 2,475<br>(89.5) | -4.0 | 0.81  | 0.87  | -0.4 (-1.3, 0.6)  |
|                   | Lives with others            | 5,503<br>(94.6) | 5,576<br>(92.8) | 4,857<br>(91.7) | -2.9 |       |       | Ref               |
| Primary insurance | TM                           | 5,991<br>(94.1) | 5,564<br>(90.6) | 5,445<br>(90.5) | -3.6 | 0.35  | 0.29  | -3.2 (-4.1, -2.3) |
|                   | MA                           | 2,187<br>(94.5) | 2,551<br>(93.5) | 1,887<br>(92.4) | -2.1 |       |       | Ref               |



|                        |                        |              |              |              |      |       |       |                   |
|------------------------|------------------------|--------------|--------------|--------------|------|-------|-------|-------------------|
| Supplemental Insurance | Medicaid               | 933 (89.5)   | 979 (86.4)   | 985 (86.0)   | -3.5 |       |       | 0.6 (-1.1, 2.4)   |
|                        | Commercial             | 4,653 (95.8) | 4,247 (93.4) | 3,882 (93.2) | -2.6 | 0.81  | 0.84  | 3.7 (2.7, 4.8)    |
|                        | None                   | 2,592 (93.1) | 2,889 (90.6) | 2,465 (89.8) | -3.3 |       |       | Ref               |
| ACO participation      | Enrolled in an ACO     |              | 874 (95.9)   | 1,658 (93.6) |      |       |       |                   |
|                        | Not enrolled in an ACO | --           | 7,241 (91.2) | 5,674 (90.4) | --   | --    | --    |                   |
| Rural urban            | Metro                  |              |              | 5,600 (8.5)  |      |       |       |                   |
|                        | Micro                  | --           | --           | 1,101 (87.7) | --   | --    | ---   |                   |
|                        | Rural                  |              |              | 631 (91.1)   |      |       |       |                   |
| Census areas (four)    | Northeast              | 1,392 (94.2) | 1,295 (92.6) | 1,332 (94.5) | 0.2  |       |       | 1.0 (-0.2, 2.1)   |
|                        | Midwest                | 1,974 (95.0) | 2,115 (92.9) | 1,866 (91.7) | -3.4 | <.001 | <.001 | Ref               |
|                        | South                  | 3,342 (95.2) | 3,169 (91.0) | 2,797 (90.3) | -4.9 |       |       | -0.0 (-1.2, 1.2)  |
|                        | West                   | 1,457 (91.4) | 1,532 (90.2) | 1,337 (88.4) | -3.0 |       |       | -3.1 (-4.6, -1.6) |
| Frailty quartiles      | 25%                    | 1,989 (94.7) | 2,073 (91.7) | 1,890 (91.8) | -2.9 |       |       | Ref               |
|                        | 50%                    | 2,095 (94.9) | 2,076 (92.4) | 1,829 (91.6) | -3.3 | 0.53  | 0.58  | -0.3 (-1.5, 1.0)  |

|                              |                                 |                 |                 |                 |      |      |      |                   |
|------------------------------|---------------------------------|-----------------|-----------------|-----------------|------|------|------|-------------------|
|                              | 75%                             | 2,078<br>(94.3) | 2,010<br>(91.3) | 1,785<br>(89.9) | -4.4 |      |      | -1.2 (-2.4, -0.1) |
|                              | 100%                            | 2,016<br>(92.8) | 1,956<br>(90.7) | 1,828<br>(90.3) | -2.5 |      |      | -1.0 (-2.5, 0.6)  |
| Number of chronic conditions | 2                               | 2,563<br>(93.8) | 2,392<br>(90.1) | 2,250<br>(90.1) | -3.7 | 0.74 | 0.75 | Ref               |
|                              | 3                               | 2,478<br>(94.1) | 2,469<br>(91.9) | 2,185<br>(91.1) | -3.0 |      |      | 1.5 (0.6, 2.5)    |
|                              | 4                               | 1,715<br>(95.7) | 1,752<br>(92.4) | 1,559<br>(92.3) | -3.3 |      |      | 2.4 (1.2, 3.6)    |
|                              | 5+                              | 1,422<br>(94.6) | 1,502<br>(92.6) | 1,338<br>(91.0) | -3.7 |      |      | 2.7 (1.4, 4.0)    |
| Self-reported health         | Excellent, very good or good, % | 6,194<br>(94.8) | 6,278<br>(92.3) | 5,722<br>(91.4) | -3.3 | 0.44 | 0.45 | 1.2 (0.1, 2.2)    |
|                              | Fair or poor, %                 | 1,964<br>(93.2) | 1,798<br>(88.9) | 1,610<br>(89.5) | -3.7 |      |      | Ref               |

SOURCE: Centers for Medicare & Medicaid Services, Medicare Current Beneficiary Survey, Survey File Data, 2010, 2013, 2016. All percentages are weighted. Income reported as don't know/refused was treated as a separate category. The multivariable model used pooled data from 2010, 2013, and 2016 and included all variables presented in the table other than ACO participation and rural-urban status (only asked in 2016). This multivariable model excluded 93 respondents for whom one or more responses were missing.

**eTable 4.** Trends and Patient and Area-Level Characteristics Associated With Reporting a Specialist as the Usual Clinician of Care, Additional Details

|                |                   | 2010                 | 2013                 | 2016                 | Difference<br>2010 – 2016 | P value<br>for trend<br>test | P value for chi<br>square,<br>2010 vs 2016 | Adjusted marginal<br>percentage point<br>difference between<br>subgroups |
|----------------|-------------------|----------------------|----------------------|----------------------|---------------------------|------------------------------|--------------------------------------------|--------------------------------------------------------------------------|
|                |                   | No. (%)<br>N = 8,116 | No. (%)<br>N = 8,005 | No. (%)<br>N = 7,158 | % point                   |                              |                                            | % point (95% CI)<br>N = 23,204                                           |
| <b>Overall</b> |                   | <b>428 (5.3)</b>     | <b>337 (4.4)</b>     | <b>272 (4.1)</b>     | -1.2                      | <b>&lt;.001</b>              | <b>&lt;.001</b>                            |                                                                          |
| Sex            | Male              | 178 (5.5)            | 151 (4.7)            | 110 (4.2)            | -1.3                      | 0.55                         | 0.48                                       | Ref                                                                      |
|                | Female            | 250 (5.2)            | 186 (4.1)            | 162 (4.0)            | -1.2                      |                              |                                            | -0.7 (-1.5, 0.1)                                                         |
| Age            | 65-74             | 171 (5.3)            | 125 (4.1)            | 97 (4.1)             | -1.3                      | 0.78                         | 0.81                                       | Ref                                                                      |
|                | 75-84             | 171 (5.1)            | 144 (4.6)            | 104 (3.8)            | -1.3                      |                              |                                            | 0.0 (-0.6, 0.6)                                                          |
|                | 85+               | 86 (5.9)             | 68 (5.0)             | 71 (4.8)             | -1.1                      |                              |                                            | 0.3 (-0.6, 1.2)                                                          |
| Income         | <\$15,000         | 93 (5.0)             | 68 (4.5)             | 50 (3.9)             | -1.1                      | 0.30                         | 0.46                                       | Ref                                                                      |
|                | \$15,000-\$29,999 | 101 (5.0)            | 96 (4.3)             | 76 (4.5)             | -0.5                      |                              |                                            | -0.5 (-1.4, 0.3)                                                         |
|                | \$30,000-\$49,999 | 92 (5.4)             | 54 (3.3)             | 44 (3.1)             | -2.2                      |                              |                                            | -1.0 (-2.0, 0.1)                                                         |
|                | \$50,000+         | 91 (6.2)             | 81 (4.6)             | 102 (4.5)            | -1.7                      |                              |                                            | 0.1 (-1.2, 1.3)                                                          |
| Race (RTI)     | White             | 334 (5.1)            | 258 (4.2)            | 200 (3.7)            | -1.4                      | 0.40                         | 0.41                                       | Ref                                                                      |
|                | Black             | 41 (6.5)             | 31 (4.1)             | 30 (5.8)             | -0.7                      |                              |                                            | 1.5 (0.2, 2.8)                                                           |

|                        |                              |           |           |           |      |      |      |                   |
|------------------------|------------------------------|-----------|-----------|-----------|------|------|------|-------------------|
|                        | Asian/Native/Unknown/Other   | 14 (3.7)  | 17 (3.8)  | 12 (5.1)  | 1.4  |      |      | 0.6 (-1.2, 2.3)   |
|                        | Non-White Hispanic           | 37 (7.2)  | 30 (6.5)  | 30 (5.6)  | -1.7 |      |      | 3.8 (1.9, 5.7)    |
| Education              | Did not complete high school | 91 (4.5)  | 61 (3.4)  | 46 (3.4)  | -1.1 | 0.83 | 0.79 | Ref               |
|                        | High school or above         | 337 (5.6) | 276 (4.6) | 226 (4.3) | -1.3 |      |      | 1.4 (0.6, 2.3)    |
| Marital status         | Not married                  | 220 (5.5) | 189 (5.1) | 146 (4.7) | -0.8 | 0.39 | 0.53 | Ref               |
|                        | Married                      | 208 (5.2) | 148 (3.8) | 126 (3.6) | -1.6 |      |      | -0.9 (-2.1, 0.2)  |
| Living Situation       | Lives alone                  | 151 (5.7) | 114 (4.9) | 100 (4.9) | -0.8 | 0.89 | 0.90 | 0.4 (-0.6, 1.3)   |
|                        | Lives with others            | 277 (5.2) | 223 (4.1) | 172 (3.8) | -1.4 |      |      | Ref               |
| Primary insurance      | TM                           | 353 (6.1) | 268 (5.0) | 226 (4.7) | -1.4 | 0.99 | 0.93 | 2.3 (1.6, 2.9)    |
|                        | MA                           | 75 (3.3)  | 69 (3.1)  | 46 (2.5)  | -0.8 |      |      | Ref               |
| Supplemental Insurance | Medicaid                     | 38 (4.1)  | 42 (3.9)  | 35 (3.6)  | -0.6 | 0.55 | 0.57 | -1.3 (-2.2, -0.3) |
|                        | Commercial                   | 272 (6.1) | 201 (5.0) | 155 (4.4) | -1.7 |      |      | 0.4 (-0.5, 1.3)   |
|                        | None                         | 118 (4.4) | 94 (3.5)  | 82 (3.8)  | -0.6 |      |      | Ref               |
| ACO participation      | Enrolled in an ACO           | --        | 42 (5.1)  | 73 (5.0)  | --   | --   | --   |                   |
|                        | Not enrolled in an ACO       |           | 295 (4.3) | 199 (3.9) |      |      |      |                   |
| Rural urban            | Metro                        | --        | --        | 234 (4.5) | --   | --   | --   |                   |
|                        | Micro                        |           |           | 28 (2.5)  |      |      |      |                   |

|                              |                                 |           |           |           |      |      |      |                  |
|------------------------------|---------------------------------|-----------|-----------|-----------|------|------|------|------------------|
|                              | Rural                           |           |           | 10 (1.8)  |      |      |      |                  |
| Census areas (four)          | Northeast                       | 86 (6.5)  | 87 (7.3)  | 75 (7.4)  | 0.9  | 0.23 | 0.28 | 3.6 (2.1, 5.2)   |
|                              | Midwest                         | 81 (4.3)  | 70 (3.4)  | 45 (2.8)  | -1.5 |      |      | Ref              |
|                              | South                           | 182 (5.5) | 124 (4.1) | 100 (3.4) | -2.2 |      |      | 0.7 (-0.2, 1.5)  |
|                              | West                            | 78 (5.0)  | 56 (3.4)  | 52 (3.8)  | -1.2 |      |      | 0.4 (-0.5, 1.2)  |
| Frailty quartiles            | 25%                             | 79 (3.9)  | 79 (4.6)  | 64 (3.6)  | -0.3 | 0.47 | 0.52 | Ref              |
|                              | 50%                             | 109 (5.6) | 81 (3.7)  | 60 (4.0)  | -1.6 |      |      | 0.8 (0.0, 1.6)   |
|                              | 75%                             | 117 (5.6) | 82 (4.6)  | 65 (4.5)  | -1.1 |      |      | 1.1 (0.2, 2.1)   |
|                              | 100%                            | 123 (6.4) | 95 (4.6)  | 83 (4.6)  | -1.9 |      |      | 1.6 (0.5, 2.8)   |
| Number of chronic conditions | 2                               | 125 (5.2) | 91 (4.1)  | 86 (4.5)  | -0.7 | 0.46 | 0.43 | Ref              |
|                              | 3                               | 127 (5.0) | 103 (4.6) | 88 (4.3)  | -0.8 |      |      | -0.3 (-1.1, 0.6) |
|                              | 4                               | 89 (5.2)  | 79 (4.5)  | 50 (3.6)  | -1.5 |      |      | -0.8 (-1.8, 0.2) |
|                              | 5+                              | 87 (6.3)  | 64 (4.3)  | 48 (3.5)  | -2.7 |      |      | -0.7 (-1.7, 0.3) |
| Self-reported health         | Excellent, very good or good, % | 307 (4.9) | 246 (4.2) | 202 (4.0) | -0.9 | 0.99 | 0.99 | -0.8 (-1.7, 0.1) |
|                              | Fair or poor, %                 | 120 (6.7) | 89 (5.1)  | 70 (4.5)  | -2.2 |      |      | Ref              |

SOURCE: Centers for Medicare & Medicaid Services, Medicare Current Beneficiary Survey, Survey File Data, 2010, 2013, 2016. All percentages are weighted. Income reported as don't know/refused was treated as a separate category. The multivariable model used pooled data from 2010, 2013, and 2016 and included all variables presented in the table other than ACO participation and rural-urban status (only asked in 2016). This multivariable model excluded 75 respondents for whom one or more responses were missing.

**eFigure 2.** Specialties of Usual Clinicians Among Respondents Reporting a Specialist in This Role, 2010-2016

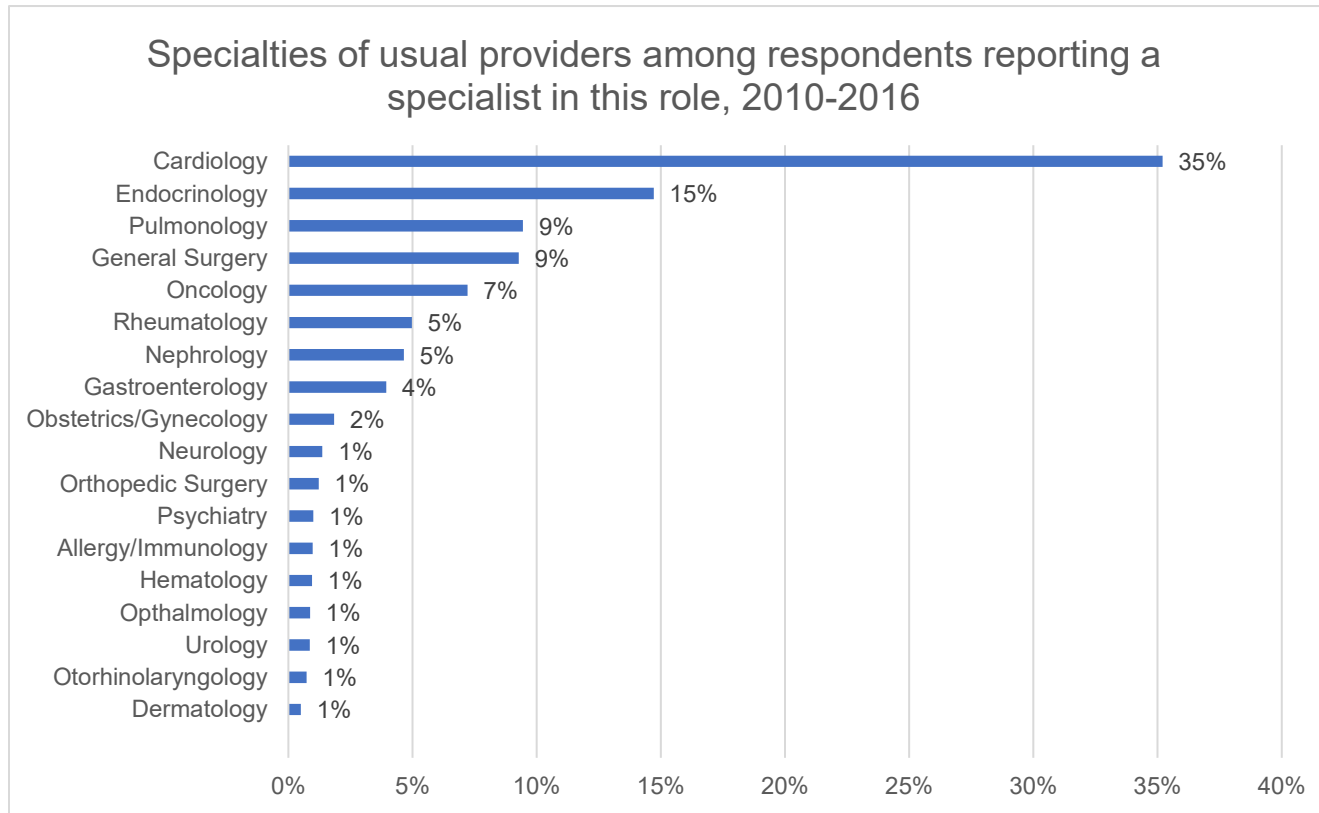

These numbers represented weighted percentages of responses pooled across the three years of analysis.
